# Supplementary material for: Calix[4]arene-cholic acid conjugates: a new class of efficient synthetic ionophores
Source: Royal Society of Chemistry journal article supplement (doi:10.1039/b415908j), 2005-01-01
Supplement: b415908j.doc [file b415908j.doc]

**SUPPLEMENTARY INFORMATION**

**Experimental Section**

All reactions were carried out under a dry argon atmosphere using freshly distilled solvents, unless otherwise noted. Tetrahydrofuran (THF) was distilled from LiAlH4. Toluene and dichloromethane were distilled from calcium hydride. Glassware was flame-dried (0.05 Torr) prior to use. When necessary, compounds were dried *in vacuo* over P2O5 or by azeotropic removal of water with toluene under reduced pressure. Starting materials and reagents purchased from commercial suppliers were generally used without purification. Reaction temperatures were measured externally; reactions were monitored by TLC on Merck silica gel plates (0.25 mm) and visualized by UV light, I2, or spraying with Ce(SO4)2, ninhydrine solutions and drying.

Flash cromatography was performed on Merck silica gel 60 (particle size: 0.040-0.063 mm). Yields refer to chromatographically and spectroscopically (1H and 13C NMR) pure materials. The NMR spectra were recorded at room temperature or when indicated at 80°C or 100°C on a Bruker DRX 400 and a Bruker DRX 300 spectrometers. Chemical shifts are reported relative to the residual solvent peak (C*H*Cl3: = 7.26, 13*C*DCl3: = 77.0; C2*H2*Cl4: = 5.80, 13*C*2D2Cl4: = 72.1). High resolution ESI-MS spectra were performed on a Q-Star Applied Biosystem mass spectrometer. Optical rotations were measured with a JASCO DIP-1000 polarimeter.

**Synthesis of the aldehydes**

**Compound 9**

A solution of *1,3 alt* tetraalkylated calix[4]arene7 (0.155 g, 0.240 mmol) in CH2Cl2 (5 ml) and a solution of TiCl4 in CH2Cl2 (1M, 4.0 mmol) were simultaneously added through dropping funnels to a stirred solution of 1,1-dichlorodimethyl ether (1.38 g, 12 mmol) in CH2Cl2 (3 ml) at 40 °C over a period of 10 min. The reaction mixture was stirred for additional 40 min and then treated with water (50 ml). The organic layer was separated, washed twice with water, dried (Na2SO4), filtered and the solvent evaporated under reduced pressure. The residue was flash-cromatographed (20-100% ethyl acetate in petroleum ether) to give **9** (0.120 g, 66 %).

**R*f***: 0.57 (60 % ethyl acetate in petroleum ether).

**1H NMR** (400 MHz, CDCl3) 3.61 (3H, s, OC*H3*), 3.62 (2H, s, ArC*H2*Ar), 3.87 (2H, m, C*H2*O), 3.98 (2H, m, ArOC*H2*), 7.65 (2H, s, Ar*H*), 9.66 (1H, s, C*H*O).

**13C NMR** (100 MHz, CDCl3) 33.2, 58.9, 71.8, 72.6, 130.9, 132.0 (× 2), 133.9 (× 2), 160.5, 191.7.

**HRESI-MS** (*m/z*): calcld for C44H48O12 [MH]+ 769.3210; found 769.3178

# **Compound 10**

A solution of *cone* tetraalkylated calix[4]arene10 (0.182 g, 0.28 mmol) in CH2Cl2 (4 ml) and a solution of TiCl4 in CH2Cl2  (1M, 6.0 mmol) were simultaneously added through dropping funnels to a stirred solution of 1,1-dichlorodimethyl ether (1.60 g, 13.9 mmol) in CH2Cl2 (2.0 ml) at 40 °C over a period of 10 min. The reaction mixture was stirred for additional 40 min and then treated with water (60 ml). The organic layer was separated, washed twice with water, dried (Na2SO4), filtered and the solvent evaporated under reduced pressure. The residue was flash-cromatographed (60-100% ethyl acetate in petroleum ether) to give **10** (0.120 g, 66 %).

**R*f***: 0.19 (70 % ethyl acetate in petroleum ether).

**1H NMR** (400 MHz, CDCl3) 3.34 (1H, d, *J*= 13.8 Hz, ArC*H*HAr), 3.37 (3H, s, OC*H3*), 3.76 (2H, m, C*H2*O), 4.19 (2H, m, ArOC*H2*), 4.59 (1H, d; *J*= 13.8 Hz, ArCH*H*Ar), 7.16 (2H, s, Ar*H*), 9.58 (1H, s, C*H*O).

**13C NMR** (100 MHz, CDCl3) 29.5, 66.4, 69.6, 73.9, 130.2, 131.5, 135.7, 161.9, 191.2.

# **HRESI-MS** (*m/z*): calcld for C44H48O12 [MH]+ 769.3210; found 769.3174

# **Synthesis of amine 8**

To a solution of 7-deoxycholic acid (5.00 g, 12.7 mmol) in CH2Cl2 (20 ml) acetic anhydride (7.1 ml, 76.2 mmol) and 4-dimethylaminopyridine (0.046 g, 0.254 mmol) were added. The reaction mixture was stirred at room temperature overnight then it was treated with HCl 2N (30 ml), saturated aqueous CuSO4 (10 ml), HCl 0.1N (10 ml) and water (10 ml), extracting every time with CH2Cl2 (2 x 15 ml). The combined organic phases were dried over Na2SO4, filtered and concentrated *in vacuo*. The desired product (6.16 g, quant.) was used in the following step without any further purification.

**R*f***: 0.53 (2 % methanol in chloroform); **[α]D**: 80.5 (*c*= 1.0, CHCl3).

**1H NMR** (400 MHz, CDCl3) 0.73 3s, C*H3*-18), 0.82 3d, *J*= 5.7 Hz, C*H3*-21), 0.90 3s, C*H3*-19), 2.03 (3H, s, COC*H3*), 2.10 (3H, s, COC*H3*), 4.70 (1H, m, H-3), 5.08 (1H, bs, H-12).

**13C NMR** (100 MHz, CDCl3) 12.4, 17.5, 21.4, 21.5, 23.0, 23.4, 25.6, 25.8, 26.6, 26.8, 27.3, 30.0, 32.2, 32.3, 34.0. 34.3, 34.5, 34.7, 35.6, 41.8, 45.0, 47.6, 49.4, 74.2, 75.8, 170.5, 170.6, 173.6.

**ESI-MS** (*m/z*): [M-H]- 475.7

To an ice-cooled solution of the acid (0.975 g, 2.10 mmol) in dry THF (12.6 ml), a solution of borane-THF complex in THF (1M, 4.20 mmol) was added dropwise and the reaction mixture was stirred at 0 °C for 2 h. Water was then added, the solvent was removed and the resulting residue redissolved in CH2Cl2, washed with HCl 1 N and brine, dried (Na2SO4), filtered and concentrated *in vacuo*. The residue was flash-cromatographed (50-80% diethyl ether in petroleum ether) to give **7** (0.715 g, 77 % ).

**R*f***: 0.39 (40 % ethyl acetate in petroleum ether); **[α]D**: 4.3 (*c*= 1.0, CHCl3).

**1H NMR** (300 MHz, CDCl3) 3s, C*H3*-18), 0.68 3d, *J*= 6.3 Hz, C*H3*-21), 0.77 3s, C*H3*-19), 1.89 (3H, s, COC*H3*), 1.96 (3H, s, COC*H3*), 2.63 (1H, bs, O*H*), 3.43 (2H, bt, *J*= 6.1 Hz, C*H2*OH), 4.55 (1H, m, H-3), 4.95 (1H, bs, H-12).

**13C NMR** (75 MHz, CDCl3) 12.2, 17.7, 21.2, 21.3, 22.9, 23.2, 25.5, 25.7, 26.4, 26.7 27.1, 27.2, 29.0, 31.5, 32.0, 33.8, 34.2, 34.5, 34.7, 35.5, 41.6, 47.6, 49.2, 63.1, 74.1, 75.8, 170.4, 170.5.

**ESI-MS** (*m/z*): [MH]+ 463.7

To a solution of the alcohol **7** (0.429 g, 0.930 mmol) in CH2Cl2 (12 ml), pyridine (0.23 ml, 2.75 mmol) and *p*-toluensulfonylchloride (0.355 g, 1.86 mmol) were added and the reaction mixture was stirred overnight. A further addition of pyridine (0.12 ml, 1.40 mmol) and *p*-toluensulfonylchloride (0.177 g, 0.93 mmol) was necessary. After 24 h the reaction was treated with HCl 1 N and extracted with CH2Cl2, dried over Na2SO4, filtered and concentrated *in vacuo*. The residue was flash-cromatographed (15-35% ethyl acetate in petroleum ether) to give the desired tosylate (0.411 g, 72 %).

**R*f***: 0.80 (20 % ethyl acetate in petroleum ether); **[α]D**: 68.0 (*c*= 1.0, CHCl3).

**1H NMR** (400 MHz, CDCl3) 3s, C*H3*-18), 0.71 3d, *J*= 6.5 Hz, C*H3*-21), 0.87 s, C*H3*-19), 2.00 (3H, s, COC*H3*), 2.05 (3H, s, COC*H3*), 2.42 (3H, s, Ar-C*H3*), 3.96 (2H, m, C*H2*OTs), 4.66 (1H, m, H-3), 5.02 (1H, bs, H-12), 7.31 (2H, d, *J*= 8.1 Hz, Ar*H*), 7.75 (2H, d, *J*= 8.1 Hz, Ar*H*).

**13C NMR** (100 MHz, CDCl3) : 12.3, 17.5, 21.3, 21.4, 21.6, 23.0, 23.3, 25.4, 25.5, 25.8, 26.5, 26.8, 27.3, 31.2, 32.2, 33.9, 34.3, 34.4, 34.6, 35.6, 41.7, 49.4, 47.5, 49.3, 71.0, 74.1, 75.8, 125.8 (× 2), 129.7 (× 2), 133.1, 144.6, 170.4, 170.5.

**ESI-MS** (*m/z*): [MH]+ 617.6

To a solution of the tosylate (0.155 g, 0.25 mmol) in dry DMF (2 ml), sodium azide (0.0814 g, 1.25 mmol) was added and the reaction mixture was stirred at 60 °C for 22 h. The reaction was quenched by adding brine and then extracted with CH2Cl2. The combined organic phases were dried over K2CO3, filtered and concentrated *in vacuo*. The residue was flash-cromatographed (5-20% ethyl acetate in petroleum ether) to give the azide (0.112 g, 92 %).

**R*f***: 0.54 (20 % ethyl acetate in petroleum ether); **[α]D**: 84.5 (*c*= 1.0, CHCl3).

**1H NMR** (400 MHz, CDCl3) 3s, C*H3*-18), 0.78 3d, *J*= 6.6 Hz, C*H3*-21), 0.87 3s, C*H3*-19), 2.00 (3H, s, COC*H3*), 2.07 (3H, s, COC*H3*), 3.20 (2H, m, C*H2*N3), 4.66 (1H, m, H-3), 5.05 (1H, bs, H-12).

**13C NMR** (100 MHz, CDCl3) : 12.3, 17.7, 21.3, 21.4, 23.0, 23.3, 25.4, 25.5, 25.8, 26.5, 26.8, 27.3, 32.1, 32.6, 33.9, 34.3, 34.6, 34.7, 35.5, 41.7, 44.9, 47.6, 49.3, 51.8, 74.1, 75.8, 170.3, 170.4.

**ESI-MS** (*m/z*): [MH]+ 488.5

To a solution of the azide (0.112 g, 0.23 mmol) in ethyl acetate (2.0 ml), PtO2 (0.011 g, 0.023 mmol) was added and the reaction mixture was stirred under hydrogen atmosphere for 48 h. The catalyst was then filtered off on a short pad of Celite™ washing with ethyl acetate. The solvent was removed under reduced pressure and the crude product was flash-cromatographed (10-30% methanol in chloroform) to give **8** (0.076 g, 72 %).

**R*f***: 0.32 (20 % methanol in chloroform); **[α]D**: 87.8 (*c*= 1.0, CHCl3).

**1H NMR** (300 MHz, CDCl3)  3s, C*H3*-18), 0.78 3d, *J*= 6.2 Hz, C*H3*-21), 0.88 3s, C*H3*-19), 2.00 (3H, s, COC*H3*), 2.07 (3H, s, COC*H3*), 2.19 (2H, m, N*H*2), 2.63 (2H, m, C*H2*NH2), 4.67 (1H, m, H-3), 5.06 (1H, bs, H-12).

**13C NMR** (75 MHz, CDCl3) : 12.3, 17.8, 21.4 (x 2), 23.0, 23.4, 25.6, 25.8, 26.5, 26.8, 27.4, 29.7, 32.2, 32.9, 34.0, 34.3, 34.6, 34.9, 35.6, 41.8, 42.4, 44.9, 47.7, 49.4, 74.1, 75.9, 170.4 (× 2).

**HRESI-MS** (*m/z*): calcld for C28H47NO4 [MH]+ 462.3583; found 462.3602

## Synthesis of the conjugates 1-5

**Compound 1**

To a solution of **8** (0.332g, 0.720 mmol) and **9** (0.091 g, 0.120 mmol) in 1.2 dichloroethane (2.5 ml) NaBH(OAc)3 (0.152 g, 0.720 mmol) and AcOH (30 µl, 0.480 mmol) were added. The reaction mixture was stirred at r.t. overnight, quenched with 1N NaOH solution and extracted with CH2Cl2. The combined organic phases were washed with brine, dried (MgSO4) and concentrated *in vacuo*. The crude residue was flash-chromatographed (5-25% of methanol in dichloromethane) to give **1** (0.240 g, 78%).

***Rf*:** 0.38 (20% methanol in chloroform); **[α]D**: 70 (*c*= 1.0, CHCl3);

**1H-NMR** (400 MHz, TCDE, 110 °C) : 0.60 (3H, s, C*H3*-18), 0.72 (3H, bd, C*H3*-21), 0.78 (3H, s, C*H3*-19), 1.84 (3H, s, COC*H3*), 1.93 (3H, s, COC*H3*), 2.72 (2H, CH2C*H2*NH), 3.30 (3H, s, OC*H3*), 3.55-3.97 (8H, m, C*H2*OCH3, ArOC*H2*, ArC*H2*Ar, HNC*H2*Ar, overlapped), 4.53 (1H, m, H-3), 4.91 (1H, bs, H-12), 7.13 (2H, s, Ar*H*).

**13C-NMR** (100 MHz, TCDE, 110 °C) : 10.7, 16.2, 19.2, 19.3, 20.9, 21.1, 21.7, 23.9, 24.2, 24.9, 25.2, 25.6, 30.7, 31.5, 32.3, 32.9, 33.1, 33.2, 33.7, 34.2, 40.3, 43.6, 45.4, 46.5, 47.8, 48.0, 56.6, 69.6, 70.5,72.4, 74.1, 121.4, 130.4 (× 2), 132.1 (× 2), 155.8, 167.9, 168.2.

HRESI-MS (*m/z*): calcld for C156H236N4O24 [MH2]2+ 1275.8763; found 1275.8676

# **Compound 2**

To a solution of **1** (0.065 g, 0.025 mmol) in methanol (0.7 ml) a catalytic amount of potassium carbonate was added and the reaction mixture was stirred at 60 °C overnight. The suspension was filtered on a short pad of Celite® washing with methanol. The solvent was removed under reduced pressure to give **2** (0.056 g, 92 %).

**R*f*:** 0.10 (20% methanol in chloroform); **[α]D**: 36.4 (*c*= 0.5, MeOH).

**1H NMR** (400 MHz, TCDE, 100 °C) : 0.60 (3s, C*H3*-18), 0.72 3d, *J*= 6.2 Hz, C*H3*-21), 0.76 3s, C*H3*-19), 1.93 (3H, s, COC*H3*), 2.72 (2H, m, CH2C*H2*NH), 3.27 (3H, s, OC*H3*), 3.32-3.88 (9H, m, C*H2*OCH3, ArOC*H2*, ArC*H2*Ar, HNC*H2*Ar, H-3, overlapped), 4.90 (1H, bs, H-12), 7.11 (2H, bs, Ar*H*).

**13C NMR** (100 MHz, TCDE, 100 °C) : 10.8, 16.2, 19.4, 20.8, 21.2, 21.7, 23.9, 24.3, 25.4, 25.7, 27.7, 28.9, 31.4, 32.3, 32.9, 33.1, 33.4, 34.2, 34.4, 34.9, 40.5, 43.5, 45.6, 46.4, 47.7, 48.2, 56.7, 69.8, 70.5, 74.1, 121.9, 130.4 (× 2), 132.2 (× 2), 155.8, 168.1.

HRESI-MS (*m/z*): calcld for C148H228N4O20 [MH2]2+ 1191.8552; found 1191.8482

**Compound 3**

Compound **2** was dissolved (0.063 g, 0.025 mmol) in a 2% solution of methanolic potassium hydroxide (0.6 ml) and the reaction mixture was stirred at 60 °C overnight. The solvent was removed under reduced pressure, the crude solid was treated with chloroform and the insoluble part was filtered off on a short pad of Celite® washing with chloroform. The solvent was removed under reduced pressure affording **3** (0.049 g, 89 %).

**[α]D**: 86.2 (*c*= 1.0, CHCl3).

**1H NMR** (400 MHz, TCDE, 100 °C) : 0.57 (3H, s, C*H3*-18), 0.78 3H, s, C*H3*-19), 0.89 3H, bd, C*H3*-21), 2.72 (2H, m, CH2C*H2*NH), 3.28 (3H, s, OC*H3*), 3.32-3.80 (9H, m, C*H2*OCH3, ArOC*H2*, ArC*H2*Ar, HNC*H2*Ar, H-3, overlapped), 3.82 (1H, bs, H-12), 7.18 (2H, bs, Ar*H*).

**13C NMR** (100 MHz, TCDE, 100 °C) : 11.0, 16.0, 20.6, 21.2, 21.9, 24.4, 25.5, 25.8, 27.1, 28.9, 31.3, 32.1, 32.4, 33.4, 33.7, 34.2, 34.4, 35.0, 40.5, 44.9, 45.6, 45.7, 46.4, 47.7, 56.7, 69.6, 69.9, 70.3, 71.2, 122.5, 130.4 (× 2), 132.6 (× 2), 155.8.

HRESI-MS (*m/z*): calcld for C140H220N4O16 [MH2]2+ 1107.8340; found 1107.8392

**Compound 4**

To a solution of **8** (0.354 g, 0.77 mmol) and **10** (0.058 g, 0.077 mmol), (0.091 g, 0.120 mmol) in 1,2 dichloroethane (3.5 ml) NaBH(OAc)3 (0.018 g, 0.46 mmol) and AcOH (18 µl, 0.308 mmol) were added. The reaction mixture was stirred at r. t. overnight, quenched with 1N NaOH solution and extracted with CH2Cl2. The combined organic phases were washed with brine, dried (MgSO4) and concentrated *in vacuo*. The crude residue was flash-chromatographed (10-40 % methanolMeOHnol% MeOHdichloroethane (2135.7, 161.9, 191.2.0000000000000000000000000000000000000000000000000000000000000000000000000000 in chloroform) to give **4** (0.112 g, 63%).

***Rf*:** 0.38 (20% methanol in chloroform); **[α]D**: 70 (*c* = 1.0, CHCl3);

**1H NMR** (400 MHz, TCDE, 90 °C) δ: 0.60 (3H, s, C*H3*-18), 0.71 (3H, d, *J*= 6.3 Hz, C*H3*-21), 0.76 (3H, s, C*H3*-19), 1.83 (3H, s, COC*H3*), 1.92 (3H, s, COC*H3*), 2.79 (2H, m, CH2C*H2*NH), 3.10 (1H, d, *J*= 12.6 Hz, ArC*H*HAr), 3.25 (3H, s, OC*H3*), 3.70 (4H, m, C*H2*OCH3; ArC*H2*NH, overlapped), 3.99 (2H, t, *J*= 5.4 Hz, ArOC*H2*), 4.32 (1H, d, *J*=12.6 Hz, ArCH*H*Ar), 4.51 (1H, m, H-3), 4.90 (1H, bs, H-12), 7.20 (2H, s, Ar*H*).

**13C NMR** (100 MHz, TCDE, 90 °C) : 10.7, 16.1, 19.3, 19.4, 20.6, 21.1, 21.7, 23.9, 24.2, 24.9, 25.2, 25.7, 28.6, 30.6, 31.5, 32.3, 32.7, 33.1, 34.0, 40.2, 43.4, 46.5, 47.0, 47.7 48.8, 56.6, 69.9, 71.5, 72.3, 74.0, 75.5, 124.2, 129.0 (× 2), 132.9 (× 2), 154.2, 167.9, 168.4.

HRESI-MS (*m/z*): calcld for C156H236N4O24 [MH2]2+ 1275.8763; found 1275.8684

**Compound 5**

To a solution of **4** (0.033 g, 0.013 mmol) in methanol (0.4 ml) a catalytic amount of potassium carbonate was added and the reaction mixture was stirred at 60 °C overnight. The reaction was treated by adding chloroform and concentrating the solution to the half of its volume. The sequence was repeated several times and then the residue was filtered on a short pad of Celite® washing with chloroform, the solvent was removed under reduced pressure to afford **5** (0.030 g, 98 %).

**R*f***: 0.11 (20 % methanol in ethyl acetate); **[α]D**: 48.4 (*c*= 0.5, MeOH).

**1H NMR** (300 MHz, TCDE, 100 °C) δ: 0.62 (3H, s, C*H3*-18), 0.74 (3H, d, *J*= 6.5 Hz, C*H3*-21), 0.78 (3H, s, C*H3*-19), 1.93 (3H, s, COC*H3*), 2.81 (2H, m, CH2C*H2*NH), 3.11 (1H, d, *J*= 12.6 Hz, ArC*H*HAr), 3.27 (3H, s, OC*H3*), 3.44 (1H, m, H-3), 3.71 (4H, m, C*H2*OCH3; ArC*H2*NH, overlapped), 4.01 (2H, m, ArOC*H2*), 4.35 (1H, d, *J*=12.6 Hz, ArCH*H*Ar), 4.91 (1H, bs, H-12), 7.20 (2H, s, Ar*H*).

**13C NMR** (75 MHz, TCDE, 100 °C) : 10.7, 16.2, 19.3, 20.6, 21.2, 21.8, 23.9, 24.3, 25.4, 25.7, 28.9, 29.8, 31.7, 32.3, 32.9, 33.1, 33.5, 34.2, 34.9, 40.5, 43.6, 46.6, 47.1, 47.7, 48.8, 56.5, 69.8 (× 2), 71.4, 74.1, 124.1, 129.0 (× 2), 132.9 (× 2), 154.2, 167.9.

**ESMS**: 2383 m/z [MH]+

HRESI-MS (*m/z*): calcld for C148H228N4O20 [MH2]2+ 1191.8552; found 1191.8482

**H+ transport experiments.**

In a 10-mL round-bottom flask chloroformic solutions of egg-phosphatidylcholine (PC, 100 μl, 100 mg/ml, 13.16 μmol) and of egg-phopsphatidylglycerol (PG, 25 μl, 20 mg/ml, 0.65 μmol) were mixed together. While rotating the flask, the organic solvent was evaporated using a stream of argon, resulting in a thin film (cake) of PC/PG (95/5, mol/mol). The last traces of solvent were removed under reduced pressure (25°C, 3 h, <0.2 Torr). To the dried film 1.0 ml of a buffer solution (25 mM HEPES, 100 mM NaCl, 0.1 mM pyranine, pH 7) was added and the lipidic cake was swollen by rotating the flask in a 40 °C water bath for 30 minutes. The dispersion was then subjected to five freeze/thaw cycles (-196 °C / 40 °C), followed by extrusion (10 times) through two stacked 100 nm polycarbonate membranes (Nuclepore Track-Etch Membranes, Whatman).

Non-entrapped pyranine was then removed by gel-filtration using a pre-packed Sephadex G-25 column (PD-10, Amersham Biosciences) that was pre-equilibrated to pH 7 with the above buffer. The eluted volume and the subsequent dilution of the liposome dispersion were estimated by weight assuming unitary density of the dispersion.

An aliquot of the dispersion (0.518 μmol of lipids) was transferred to a quartz spectrofluorimetry cuvette and buffer solution was added until a final volume of 3040 µl to get a final lipid concentration of 0.17 mM. To the dispersion was added a methanolic solution (max 30 µl) of calixarene- steroid conjugate to obtain the desired ratio (mol ionophore / mol lipid) and the mixture was incubated at ambient temperature for 30 minutes.

Kinetic measurements were carried out at 25 °C. Excitation and emission wavelengths were 460 and 511 nm respectively, while excitation and emission slits were both set at 5 nm.

After monitoring the fluorescence emission intensity for 200 seconds, a pH gradient of 0.6 unit was established by addition of 50 µL of 0.5 M NaOH through an injector port. The fluorescence was then monitored for 1200 seconds before the complete pH discharge, obtained via addition of 15 µL of a 5% (v/v) aqueous solution of Triton® X-100. Monitoring was continued for 200 seconds after the last addition. The pseudo-first order rate constants were obtained by non-linear regression analysis of the fluorescence *vs* time data and the fit error on the rate constant was always less than 1%.

**Na+ transport experiments.**

In a 10-mL round-bottom flask chloroformic solutions of egg-phosphatidylcholine (PC, 150 μl, 100 mg/mL, 20 μmol) and of egg-phopsphatidylglycerol (PG, 40 μl, 20 mg/ml, 1 μmol) were mixed together with a methanolic solution of the calixarene-steroid conjugate to obtain the desired ratio (mol ionophore / mol lipid). While rotating the flask, the organic solvent was evaporated using a stream of argon, resulting in a thin film (cake) of PC/PG (95/5, mol/mol). The last traces of solvent were removed under reduced pressure (25°C, 3 h, <0.2 Torr). To the dried film 1.0 mL of a 100 mM LiCl solution, which was 10 % in D2O, was added and the lipidic cake was swollen by rotating the flask in a 40 °C water bath for 30 minutes. The dispersion was then subjected to five freeze/thaw cycles (-196 °C / 42 °C), followed by extrusion (10 times) through two stacked 100 nm polycarbonate membranes (Nuclepore Track-Etch Membranes, Whatman).

The solution of the shift reagent was prepared by mixing together:

- 100 µl of a 40 mM DyCl3·6H2O solution
- 100 µl of a 120 mM Na5P3O10 solution
- 100 µl of a 400 mM NaCl solution
- 100 µl of D2O
- 600 µl of bidistilled deionised water

A 350 µl aliquot of the lipidic dispersion and a 350 µl aliquot of the shift reagent were mixed together in a 5-mm NMR tube and NMR spectra were recorded continuously (14 spectra of one hour accumulation each) at 25 °C overnight on a Jeol GX-400 (400 MHz) or a Jeol GX-270 (270 MHz) spectrometers. In this condition the signal of the Na+ ion inside to the vesicular water pool (Nain) is downfield-shifted by 11 ppm respect to the signal of the Na+ present in bulk water (Naout). NMR peak areas were calculated using the JEOL Delta NMR software. The pseudo-first order rate constants were obtained by non-linear regression analysis of the Nain  NMR peak areas *vs* time data and the fit error on the rate constant was always less than 1%.

**Partition of the ionophores in the vesicular aggregates.**

In a 10-mL round-bottom flask chloroformic solutions of egg-phosphatidylcholine (PC, 300 μl, 100 mg/mL, 40 μmol) and of egg-phopsphatidylglycerol (PG, 80 μl, 20 mg/mL, 2 μmol) were mixed together. While rotating the flask, the organic solvent was evaporated using a stream of argon, resulting in a thin film (cake) of PC/PG (95/5, mol/mol). The last traces of solvent were removed under reduced pressure (25°C, 3 h, <0.2 Torr). To the dried film were added 2,0 mL of a 100 mM LiCl solution and the lipidic cake was swollen by rotating the flask in a 40 °C water bath for 30 minutes. The dispersion was then subjected to five freeze/thaw cycles (-196 °C / 40 °C), followed by extrusion (10 times) through two stacked 100 nm polycarbonate membranes (Nuclepore Track-Etch Membranes, Whatman).

A 550 μL aliquot of the dispersion was diluted to 1550 μL with the same LiCl solution and a methanolic solution of calixarene-steroid conjugate was added to obtain a 1% final concentration (mol ionophore / mol lipid). After 30 minutes of incubation, 1 mL of the dispersion was filtered using a centrifugal filter device (Ultrafree®-CL, Millipore; 30 minutes, 20 °C, 4250 rpm). The filtered solution was then diluted with methanol and assayed by means of UV-VIS spectroscopy (λmax: 210 nm). Absorbances were correlated with concentrations by using calibration curves obtained by UV-VIS measurements on solutions at known concentration. The degree of partition was obtained by difference between the calculated ionophore concentration in the filtered solution and the initial concentration.
